# Supplementary material for: Two novel chiral tetranucleate copper-based complexes: crystal structures, nanoparticles, and inhibiting angiogenesis and the growth of human breast cancer by regulating the VEGF/VEGFR2 signal pathwayin vitro
Source: Royal Society of Chemistry journal article supplement (doi:10.1039/d0dt00380h), 2020-01-01
Supplement: d0dt00380h1.pdf [file d0dt00380h1.pdf]

## Supporting Information

### Two Novel Chiral Tetranucleate Copper-based Complexes: Crystal Structures, Nanoparticles, and Inhibiting Angiogenesis and the Growth of Human Breast Cancer by Regulating VEGF/VEGFR2 Signal Pathway in Vitro

Pei-Lu Zhang,<sup>a</sup> Xiao-Xiao Hou,<sup>a</sup> Mei-Rong Liu,<sup>b</sup> Fu-Ping Huang,<sup>c</sup> and Xiu-Ying Qin <sup>\*a,c</sup>

#### Instruments and materials

**Materials.** All materials and solvents were purchased commercially and used without further purification unless specifically noted. Ultrapure Milli-Q water was used in all experiments. 3-bromo-5- chlorosalicaldehyde and 5- nitrosalicylic aldehyde reagent were purchased from SAAN Chemical Technology Co., Ltd. *L*-Methioninol was purchased from Sequoia precision Chemical Co., Ltd. Potassium hydroxide(A.R.), Anhydrous methanol (A.R.)and Copper nitrate trihydrate (A.R.)were purchased from Xilong Science Co., Ltd. MTT, penicillin/streptomycin, and dimethylsulfoxide was purchased from Sigma-Aldrich, USA. Dulbecco's modified eagle medium (DMEM, Gibco), RPMI-1640 medium(Gibco), Fetal bovine serum (FBS, GEMINI), pancreatic enzyme(Gibco), cell culture plates(Eppendorf), Anti-VEGFR2, Anti-phospho-VEGFR2, Anti-FAK, Anti-phospho-FAK, Anti-AKT , Anti-phospho-AKT, Anti-Erk1/2, and Anti-phosphoErk1/2(Cell Signaling Technology) were used. GAPDH antibodies were procured from ZSGB-BIO. Annexin V/PI apoptosis kit was purchased from BD Bioscience. The JC-1 mitochondrial membrane potential detection kit and reactive oxygen species (ROS) assay kit were from Beyetime (Shanghai, China). HUVECs and MDA-MB-231 cell lines were purchased from Shanghai oulu biological technology Co, ltd. Vascular endothelial growth factor (VEGF) was purchased from Sangon Biotech (Shanghai) Co., Ltd. Cell culture: HUVECs were cultured in DMEM medium supplemented with FBS(10%), penicillin(100 µg/mL ), and streptomycin (100 µg/mL); MDA-MB-231 cells were cultured in DMEM medium supplemented with FBS(15%), penicillin (100 µg/mL ), and streptomycin (100 µg/mL).They were incubated at 37°C in a humidified incubator with 5 % CO<sub>2</sub> and 95 % air, and the medium was changed thrice weekly. Matrigel was purchased from Corning.

**Instruments.** IR spectras were taken on a IRAffinity-1 FT-IR spectrometer with KBr pallets in the range of 4000~400 cm<sup>-1</sup>. The elemental analyses for C, H and N were performed on a Perkin-Elmer 2400C elemental analyzer. The crystal structures were determined by a four-circle CCD diffractometer (SuperNova, Single source at offset, Eos). Mass spectra were recorded on a Liquid Chromatography Mass Spectrometry (Exactive, Thermo Fisher Scientific) with DMSO as solvent

and CH<sub>3</sub>OH diluent. X-ray powder diffractograms were recorded on a X-ray powder diffractometer (X' Pert PRO, Netherlands PANalytical company). Nanoparticle analysis was performed by transmission electron microscopy (HITACHI HT7700). ICP-MS were determined by NexION 300X. Apoptosis assay were determined by BD FACSCanto. Tube formation assays of HUVECs were photographed with a bright field of inverted fluorescence phase contrast microscope (DMi8 Leica, Germany). Cells were cultured in a CO<sub>2</sub> incubator (170S, Galaxy, New Brunswick). Cells were observed with a inverted microscope (OLYMPUS CKX35, Japan). High-speed refrigeration centrifuge (LegendRT-Plus, Thermo, USA), pure water ultra-pure water system (Elix3+30L+3YNERGY, Millipore, USA), high-speed centrifuge(Mini Spin, Eppendorf, Germany), protein transfer membrane system(TE22, GE, USA), protein electrophoresis tank(Bio-Rad Mini-PROTEAN Tetra Cell, USA), rockers(TS-1000, Lin bell, Jiangsu province, China), and gel imaging system UV projector(ZF-4, Shanghai, China), were used in western blot assays.

## Supporting Tables

Table S1. Crystal data and structure refinement parameters for TNCu-1 and TNCu-2.

| Parameters                                                                                  | TNCu-1                                                                                                                                                                        | TNCu-2                                                                                                                                                                             |
|---------------------------------------------------------------------------------------------|-------------------------------------------------------------------------------------------------------------------------------------------------------------------------------|------------------------------------------------------------------------------------------------------------------------------------------------------------------------------------|
| Empirical formula                                                                           | C <sub>48</sub> H <sub>56</sub> Cu <sub>4</sub> N <sub>8</sub> O <sub>16</sub> S <sub>4</sub>                                                                                 | C <sub>96</sub> H <sub>112</sub> Br <sub>8</sub> Cl <sub>8</sub> Cu <sub>8</sub> N <sub>8</sub> O <sub>20</sub> S <sub>8</sub>                                                     |
| Formula moiety                                                                              | [Cu <sub>4</sub> (C <sub>12</sub> H <sub>14</sub> N <sub>2</sub> O <sub>4</sub> S) <sub>4</sub> ]                                                                             | [Cu <sub>4</sub> (C <sub>12</sub> H <sub>13</sub> NO <sub>2</sub> SClBr) <sub>4</sub> ] <sub>2</sub> •4H <sub>2</sub> O                                                            |
| Formula weight                                                                              | 1383.40                                                                                                                                                                       | 3385.62                                                                                                                                                                            |
| Temperature (K)                                                                             | 293(2)                                                                                                                                                                        | 293(2)                                                                                                                                                                             |
| Wavelength (Å)                                                                              | 0.71073                                                                                                                                                                       | 0.71073                                                                                                                                                                            |
| Crystal system                                                                              | Tetragonal, <i>P</i> <sub>42</sub>                                                                                                                                            | Triclinic, <i>P</i> <sub>1</sub>                                                                                                                                                   |
| <i>a</i> (Å)                                                                                | 14.2730 (3)                                                                                                                                                                   | 10.1515 (3)                                                                                                                                                                        |
| <i>b</i> (Å)                                                                                | 14.2730 (3)                                                                                                                                                                   | 13.6106 (4)                                                                                                                                                                        |
| <i>c</i> (Å)                                                                                | 13.9589 (3)                                                                                                                                                                   | 22.1971 (9)                                                                                                                                                                        |
| $\alpha$ (°)                                                                                | 90                                                                                                                                                                            | 85.732 (3)                                                                                                                                                                         |
| $\beta$ (°)                                                                                 | 90                                                                                                                                                                            | 84.872 (3)                                                                                                                                                                         |
| $\gamma$ (°)                                                                                | 90                                                                                                                                                                            | 85.986 (2)                                                                                                                                                                         |
| <i>V</i> (Å <sup>3</sup> )                                                                  | 2843.69(13)                                                                                                                                                                   | 3039.98 (18)                                                                                                                                                                       |
| <i>Z</i> , <i>D</i> <sub>Calcd</sub> (Mg.m <sup>-3</sup> )                                  | 2, 1.616                                                                                                                                                                      | 1, 1.849                                                                                                                                                                           |
| Abs. coefficient (mm <sup>-1</sup> )                                                        | 1.696                                                                                                                                                                         | 4.378                                                                                                                                                                              |
| <i>F</i> (000)                                                                              | 1416                                                                                                                                                                          | 1680                                                                                                                                                                               |
| Limiting indices                                                                            | $-17 \leq h \leq 17$                                                                                                                                                          | $-12 \leq h \leq 12$                                                                                                                                                               |
|                                                                                             | $-17 \leq k \leq 17$                                                                                                                                                          | $-17 \leq k \leq 16$                                                                                                                                                               |
|                                                                                             | $-17 \leq l \leq 17$                                                                                                                                                          | $-27 \leq l \leq 27$                                                                                                                                                               |
| $\theta$ range for data refinement (°)                                                      | 3.51~26.367                                                                                                                                                                   | 3.29~26.37                                                                                                                                                                         |
| Reflections collected                                                                       | 24081                                                                                                                                                                         | 24959                                                                                                                                                                              |
| Independent reflections                                                                     | 5803 ( <i>R</i> <sub>int</sub> = 0.027)                                                                                                                                       | 20039( <i>R</i> <sub>int</sub> = 0.027)                                                                                                                                            |
| Observed data                                                                               | 4107 ( <i>I</i> > 2σ( <i>I</i> ))                                                                                                                                             | 14762( <i>I</i> > 2σ( <i>I</i> ))                                                                                                                                                  |
| Refinement method                                                                           | Full-matrix least-squares on F <sup>2</sup>                                                                                                                                   | Full-matrix least-squares on F <sup>2</sup>                                                                                                                                        |
| Nref / Npar / Nres                                                                          | 5803/374/6                                                                                                                                                                    | 20039/1425/23                                                                                                                                                                      |
| Flack parameter *                                                                           | 0.009(9)                                                                                                                                                                      | -0.008(10)                                                                                                                                                                         |
| Final <i>R</i> <sub>1</sub> , <i>R</i> <sub>2</sub> , <i>S</i> [ <i>I</i> > 2σ( <i>I</i> )] | <i>R</i> <sub>1</sub> = 0.0512, <i>R</i> <sub>2</sub> = 0.1435, <i>S</i> = 1.079<br>= 1/[σ <sup>2</sup> ( <i>F</i> <sub>o</sub> <sup>2</sup> )+(0.1 <i>P</i> ) <sup>2</sup> ] | <i>R</i> <sub>1</sub> = 0.0614, <i>R</i> <sub>2</sub> = 0.1514, <i>S</i> = 1.042<br>= 1/[σ <sup>2</sup> ( <i>F</i> <sub>o</sub> <sup>2</sup> ) + (0.1000 <i>P</i> ) <sup>2</sup> ] |
|                                                                                             | Where <i>P</i> =( <i>F</i> <sub>o</sub> <sup>2</sup> +2 <i>F</i> <sub>c</sub> <sup>2</sup> )/3                                                                                | where <i>P</i> = ( <i>F</i> <sub>o</sub> <sup>2</sup> + 2 <i>F</i> <sub>c</sub> <sup>2</sup> )/3                                                                                   |
| Final <i>R</i> <sub>1</sub> , <i>R</i> <sub>2</sub> , <i>S</i> (all data)                   | <i>R</i> <sub>1</sub> = 0.0765, <i>R</i> <sub>2</sub> = 0.1676, <i>S</i> = 1.079                                                                                              | <i>R</i> <sub>1</sub> = 0.0939, <i>R</i> <sub>2</sub> = 0.1810, <i>S</i> = 1.043                                                                                                   |
| Shift max / mean                                                                            | 0.000/0.000                                                                                                                                                                   | 0.000/0.000                                                                                                                                                                        |
| Completeness to theta                                                                       | 0.997                                                                                                                                                                         | 0.998                                                                                                                                                                              |

\* For TNCu-1: Parsons, Flack and Wagner, Acta Cryst. B69 (2013) 249-259; For TNCu-2: Flack H D (1983), Acta Cryst. A39, 876-881.

Table S2. Selected bond distances (Å) and angles (°) for complexes TNCu-1.

| Bond            | Dist. (Å) | Bond                    | Dist. (Å) | Angle                        | Dist. (Å) |
|-----------------|-----------|-------------------------|-----------|------------------------------|-----------|
| Cu(1)—O(4)      | 1.951 (6) | Cu(2)—O(4) <sup>i</sup> | 1.956(8)  | O(5)—Cu(2)—O(4) <sup>i</sup> | 94.3(3)   |
| Cu(1)—O(8)      | 1.930(7)  | Cu(2)—O(5)              | 1.900(7)  | O(8)—Cu(2)—O(4) <sup>i</sup> | 87.6(3)   |
| Cu(1)—O(1)      | 1.888(7)  | Cu(2)—O(8)              | 1.934(6)  | O(8)—Cu(2)—N(3)              | 83.7(3)   |
| Cu(1)—N(2)      | 1.945(7)  | Cu(2)—N(3)              | 1.943(8)  | O(5)—Cu(2)—N(3)              | 94.5(3)   |
| Angle           | (°)       | Angle                   | (°)       | Angle                        | (°)       |
| O(8)—Cu(1)—O(4) | 87.4(3)   | N(2)—Cu(1)—O(4)         | 83.9(3)   | O(5)—Cu(2)—O(8)              | 177.9(3)  |
| O(1)—Cu(1)—O(8) | 94.4(3)   | O(8)—Cu(1)—N(2)         | 165.6(3)  | N(3)—Cu(2)—O(4) <sup>i</sup> | 169.0(3)  |
| O(1)—Cu(1)—N(2) | 94.4(3)   | O(1)—Cu(1)—O(4)         | 178.1(3)  |                              |           |

Symmetry code: (i) -x, -y+1, -z.

Table S3. Selected bond distances (Å) and angles (°) for complexes TNCu-2.

| Bond              | Dist. (Å)  | Bond              | Dist. (Å) | Bond              | Dist. (Å) |
|-------------------|------------|-------------------|-----------|-------------------|-----------|
| Cu(1)—O(2)        | 1.918 (10) | Cu(2)—O(8)        | 1.915 (7) | Cu(3)—O(2)        | 1.908 (8) |
| Cu(1)—O(4)        | 1.986 (8)  | Cu(2)—O(4)        | 1.931 (8) | Cu(3)—O(5)        | 1.931 (9) |
| Cu(1)—O(1)        | 1.894 (10) | Cu(2)—N(2)        | 1.944 (9) | Cu(3)—O(6)        | 1.959 (8) |
| Cu(1)—N(1)        | 1.962 (9)  | Cu(2)—O(3)        | 1.911 (9) | Cu(3)—N(3)        | 1.944 (9) |
| Cu(4)—N(4)        | 1.957 (9)  | Cu(5)—O(12)       | 1.918 (7) | Cu(6)—O(12)       | 1.947 (8) |
| Cu(4)—O(7)        | 1.918 (10) | Cu(5)—O(9)        | 1.905 (7) | Cu(6)—O(16)       | 1.957 (7) |
| Cu(4)—O(8)        | 1.963 (8)  | Cu(5)—O(10)       | 1.958 (7) | Cu(6)—O(11)       | 1.905 (8) |
| Cu(4)—O(6)        | 1.960 (8)  | Cu(5)—N(5)        | 1.937 (8) | Cu(6)—N(6)        | 1.957 (9) |
| Cu(7)—O(14)       | 1.924 (7)  | Cu(7)—O(10)       | 1.939 (7) | Cu(8)—O(16)       | 1.927 (7) |
| Cu(7)—O(13)       | 1.908 (8)  | Cu(8)—O(15)       | 1.897 (8) | Cu(8)—O(14)       | 1.959 (7) |
| Cu(7)—N(7)        | 1.927(9)   | Cu(8)—N(8)        | 1.943 (8) |                   |           |
| Angle             | (°)        | Angle             | (°)       | Angle             | (°)       |
| O(2)—Cu(1)—O(4)   | 87.6 (3)   | O(4)—Cu(2)—N(2)   | 84.6(3)   | O(2)—Cu(3)—O(5)   | 94.2 (4)  |
| O(2)—Cu(1)—N(1)   | 83.9 (4)   | O(3)—Cu(2)—O(8)   | 94.2 (3)  | O(2)—Cu(3)—O(6)   | 89.8 (4)  |
| O(1)—Cu(1)—O(4)   | 96.0 (3)   | O(3)—Cu(2)—O(4)   | 177.4 (3) | O(2)—Cu(3)—N(3)   | 166.2 (4) |
| O(1)—Cu(1)—N(1)   | 93.3 (4)   | O(3)—Cu(2)—N(2)   | 92.8 (4)  | N(3)—Cu(3)—O(6)   | 83.2 (4)  |
| N(1)—Cu(1)—O(4)   | 167.6 (4)  | O(8)—Cu(2)—O(4)   | 88.2 (3)  | O(5)—Cu(3)—N(3)   | 93.5 (4)  |
| O(1)—Cu(1)—O(2)   | 174.1 (4)  | O(8)—Cu(2)—N(2)   | 168.1 (4) | O(5)—Cu(3)—O(6)   | 175.3 (3) |
| O(6)—Cu(4)—O(8)   | 90.2 (3)   | O(12)—Cu(5)—O(10) | 89.3(3)   | O(11)—Cu(6)—O(12) | 172.9 (3) |
| O(7)—Cu(4)—N(4)   | 94.0 (4)   | O(12)—Cu(5)—N(5)  | 169.3(3)  | O(11)—Cu(6)—O(16) | 96.5 (3)  |
| N(4)—Cu(4)—O(6)   | 172.1 (4)  | O(9)—Cu(5)—O(12)  | 93.7 (3)  | O(11)—Cu(6)—N(6)  | 94.2 (4)  |
| O(7)—Cu(4)—O(8)   | 176.2 (4)  | O(9)—Cu(5)—O(10)  | 176.3 (3) | O(12)—Cu(6)—O(16) | 87.7 (3)  |
| O(7)—Cu(4)—O(6)   | 93.6 (4)   | O(9)—Cu(5)—N(5)   | 93.1 (3)  | O(12)—Cu(6)—N(6)  | 83.1 (3)  |
| N(4)—Cu(4)—O(8)   | 82.3 (4)   | N(5)—Cu(5)—O(10)  | 84.1 (3)  | N(6)—Cu(6)—O(16)  | 163.3 (3) |
| N(7)—Cu(7)—O(10)  | 170.0 (4)  | O(14)—Cu(7)—N(7)  | 82.3 (3)  | O(15)—Cu(8)—O(16) | 178.4 (3) |
| O(13)—Cu(7)—O(14) | 176.1 (3)  | O(14)—Cu(7)—O(10) | 87.7 (3)  | O(15)—Cu(8)—O(14) | 94.0 (3)  |
| O(13)—Cu(7)—O(10) | 96.1 (3)   | O(16)—Cu(8)—O(14) | 87.5 (3)  | O(15)—Cu(8)—N(8)  | 94.2 (3)  |
| O(13)—Cu(7)—N(7)  | 93.8(4)    | N(8)—Cu(8)—O(14)  | 167.0 (3) | O(16)—Cu(8)—N(8)  | 84.5 (3)  |

Table S4. Hydrogen bond lengths (Å) and angles (°) for complexes TNCu-1 and TNCu-2.

| TNCu-1                              |             |               |                       |              |
|-------------------------------------|-------------|---------------|-----------------------|--------------|
| <i>D</i> —H... <i>A</i>             | <i>D</i> —H | H... <i>A</i> | <i>D</i> ... <i>A</i> | < <i>DHA</i> |
| C(8)—H(8A)...O(5) <sup>i</sup>      | 0.97        | 2.48          | 2.987(13)             | 112.5        |
| C(8)—H(8A)...O(7) <sup>ii</sup>     | 0.97        | 2.60          | 3.504 (16)            | 154.4        |
| C(20)—H(20A)...S(2)                 | 0.97        | 2.99          | 3.581 (11)            | 120.4        |
| C(24)—H(24C)...S(1) <sup>iii</sup>  | 0.96        | 3.12          | 3.561 (17)            | 109.7        |
| TNCu-2                              |             |               |                       |              |
| <i>D</i> —H... <i>A</i>             | <i>D</i> —H | H... <i>A</i> | <i>D</i> ... <i>A</i> | < <i>DHA</i> |
| C(80)—H(80A)...O(15)                | 0.97        | 2.49          | 3.038(14)             | 115.5        |
| C(8)—H(8A)...C(15)                  | 0.97        | 2.74          | 3.563(12)             | 143.6        |
| C(8)—H(8A)...S(1)                   | 0.97        | 2.98          | 3.588(12)             | 121.5        |
| C(92)—H(92A)...O(2W) <sup>i</sup>   | 0.97        | 2.55          | 3.23(3)               | 126.9        |
| C(90)—H(90)...S(7) <sup>ii</sup>    | 0.93        | 3.00          | 3.816(12)             | 147.9        |
| C(56)—H(56A)...O(3W)                | 0.97        | 2.58          | 3.29(4)               | 129.5        |
| C(94)—H(94B)...Cl(2) <sup>iii</sup> | 0.97        | 2.88          | 3.757(13)             | 150.9        |
| C(64)—H(64)...Br(1) <sup>iv</sup>   | 0.93        | 3.10          | 3.892(12)             | 144.6        |
| C(93)—H(93)...S(8)                  | 0.98        | 2.65          | 3.176(11)             | 114.0        |
| C(45)—H(45)...S(4)                  | 0.98        | 2.90          | 3.377(13)             | 110.9        |
| C(20)—H(20B)...O(1W)                | 0.97        | 2.61          | 3.22(3)               | 121.0        |
| C(46)—H(46B)...Br(6) <sup>v</sup>   | 0.97        | 3.09          | 3.732(12)             | 124.8        |
| C(83)—H(83A)...Br(6)                | 0.97        | 3.14          | 4.008(11)             | 149.9        |
| C(10)—H(10A)...S(2) <sup>ii</sup>   | 0.97        | 2.95          | 3.905(14)             | 168.4        |
| C(71)—H(71A)...S(8) <sup>vi</sup>   | 0.97        | 2.94          | 3.669(16)             | 133.1        |
| C(42)—H(42)...S(3) <sup>ii</sup>    | 0.93        | 2.78          | 3.661(17)             | 159.5        |
| C(60)—H(60B)...C(16) <sup>vii</sup> | 0.96        | 2.68          | 3.627(17)             | 170.2        |

Symmetry codes:

For complex TNCu-1: (i)  $-x, -y+1, z$ ; (ii)  $y, -x+1, z-1/2$ ; (iii)  $-x, -y+1, z+1$ 

Symmetry codes:

For complex TNCu-2: (i)  $x+1, y, z$ ; (ii)  $x, y-1, z$ ; (iii)  $x, y, z-1$ ; (iv)  $x+1, y+1, z-1$ ; (v)  $x, y-1, z+1$ ; (vi)  $x, y+1, z$ ; (vii)  $x-1, y-1, z$ .

## Supplementary Figures

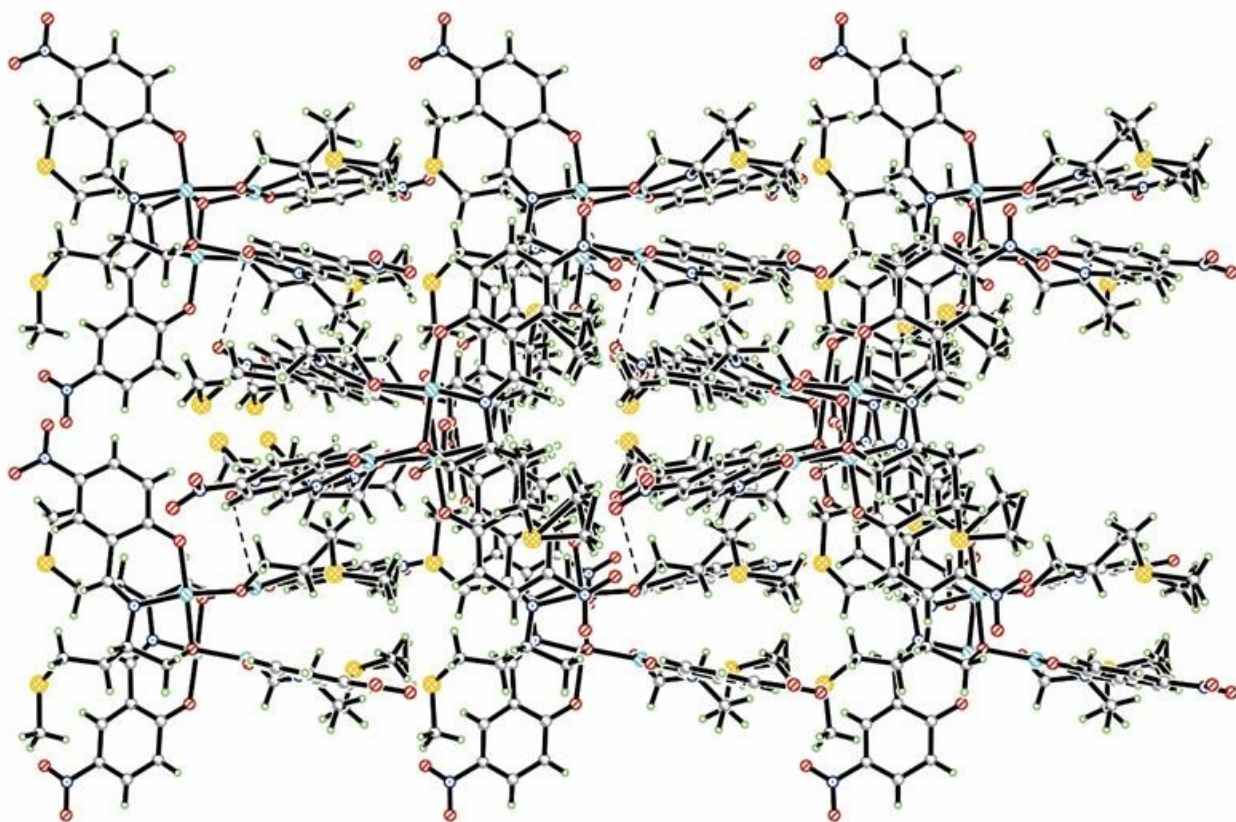

**Figure S1.** The two-dimensional network structure of TNCu-1 on the *ac* plane.

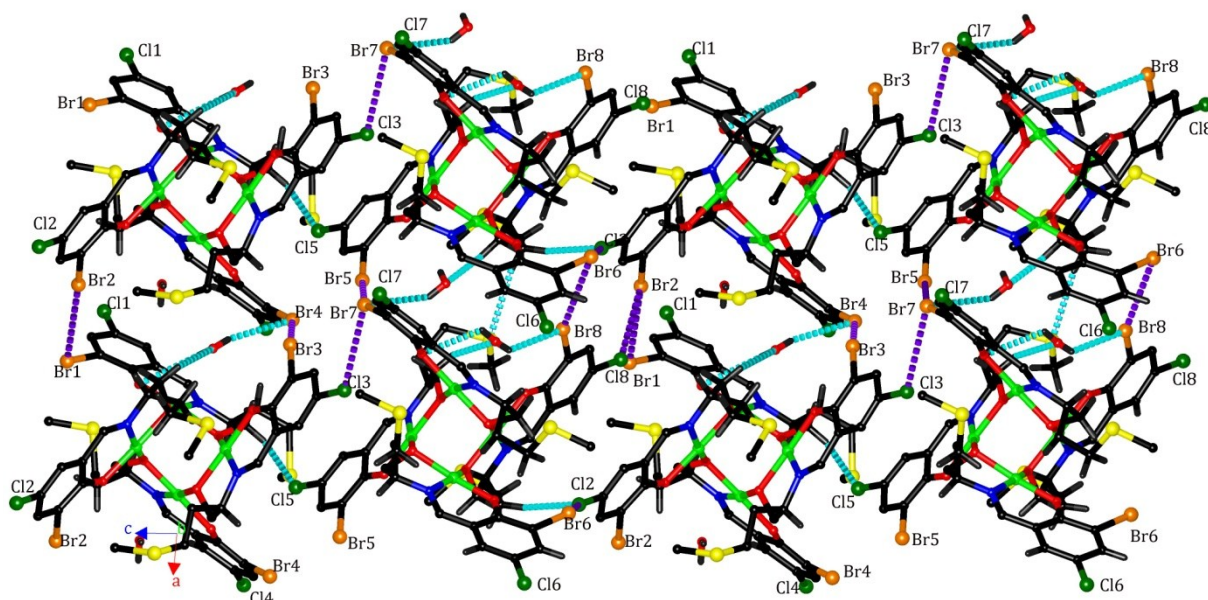

**Figure S2.** The two-dimensional network structure of TNCu-2 on the *ac* plane, the dotted lines in light blue indicate hydrogen bondings, and the dotted lines in purple indicate Halogen ... Halogen interaction (the distance of Br ... Br is 3.4844(1)~3.6032(1) Å, and the distance of Cl ... Br is 3.7360(1)~3.7548(1) Å). For clarity, some of the hydrogens on the C atoms were omitted.

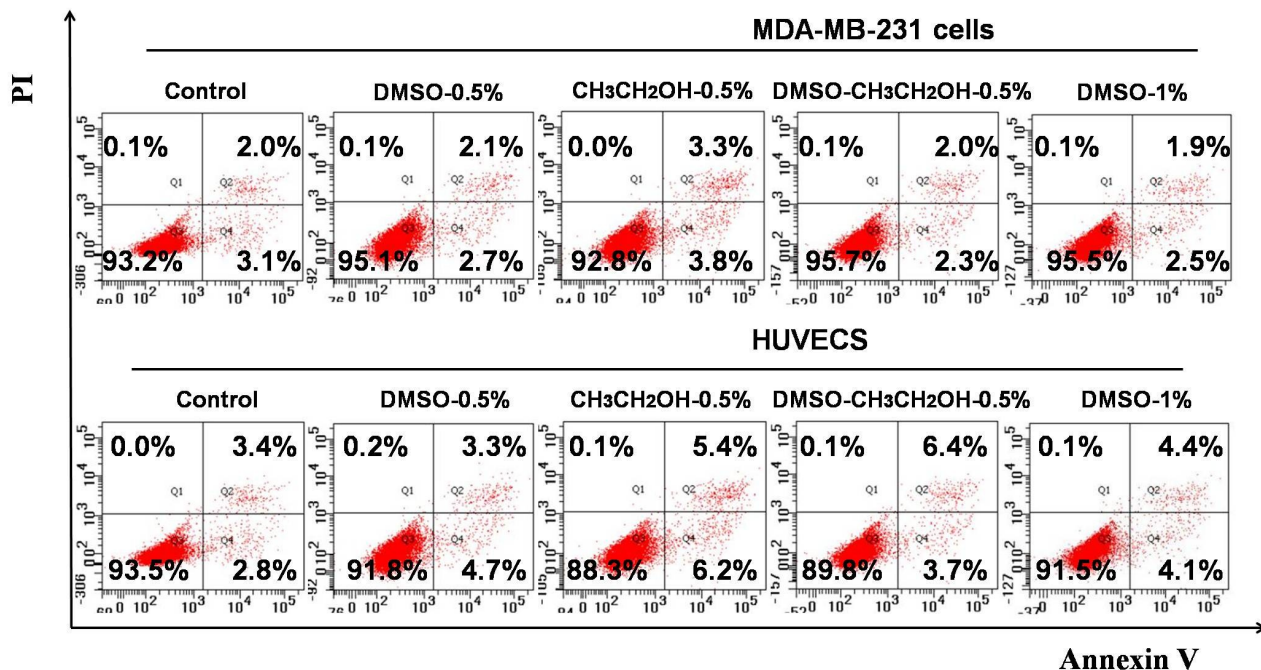

**Figure S3.** MDA-MB-231 cells and HUVECs were stained with annexin V/PI, respectively. Solvent induced apoptosis of MDA-MB-231 cells and HUVECs was analysed by flow cytometry after the cells were treated with different concentrations for 48 h.

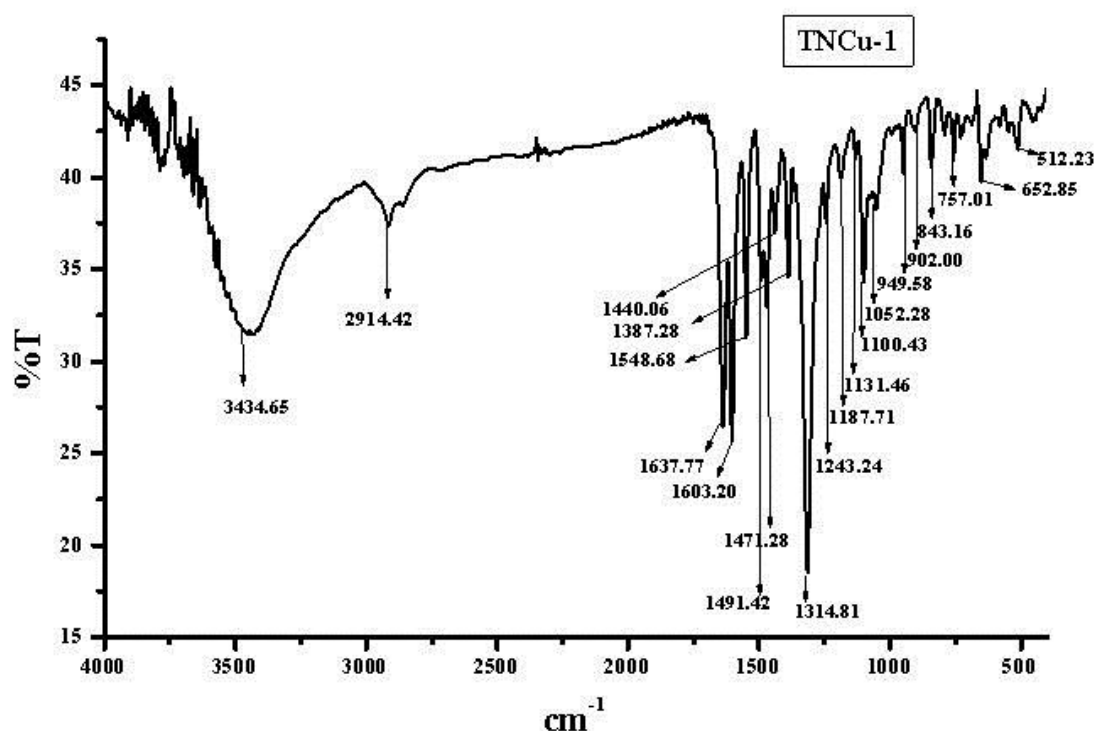

**Figure S4.** FT-IR of [Cu<sub>4</sub>(C<sub>12</sub>H<sub>14</sub>N<sub>2</sub>O<sub>4</sub>S)<sub>4</sub>] (abbreviated as TNCu-1), and H<sub>2</sub>(C<sub>12</sub>H<sub>14</sub>N<sub>2</sub>O<sub>4</sub>S) = C<sub>6</sub>H<sub>3</sub>(OH)(NO<sub>2</sub>)CH=NCH(CH<sub>2</sub>OH)(CH<sub>2</sub>CH<sub>2</sub>SCH<sub>3</sub>). 3434.65(vs, O-H, Maybe the solvent didn't evaporate completely), 2914.42 (m, C-H), 1637.77 (vs, C=N), 1603.20 (vs, C=C for benzene), 1314.81(s, -NO<sub>2</sub>), 1100.43(s, C-O), 652.85(w, C-S).



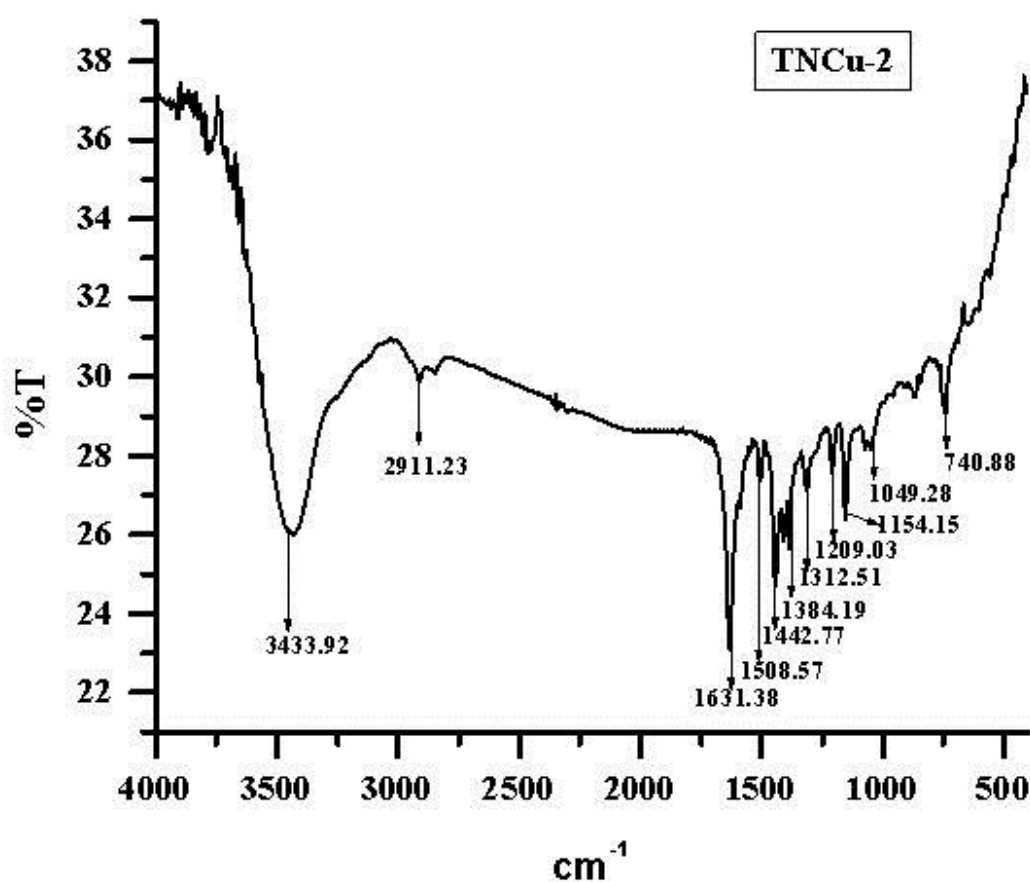

**Figure S5.** FT-IR of  $[\text{Cu}_4(\text{C}_{12}\text{H}_{13}\text{NO}_2\text{SClBr})_4]_2 \cdot 4\text{H}_2\text{O}$ , (abbreviated as TNCu-2) and  $\text{H}_2(\text{C}_{12}\text{H}_{13}\text{NO}_2\text{SClBr}) = \text{C}_6\text{H}_2\text{ClBr}(\text{OH})\text{CH}=\text{NCH}(\text{CH}_2\text{OH})(\text{CH}_2\text{CH}_2\text{SCH}_3)$ . 3433.92 (vs, O-H of  $\text{H}_2\text{O}$ ), 2911.23(m, C-H), 1631.38(vs, C=N), 1442.77(m, C-H), 1384.19(m, C-H), 1312.51(m, C-O), 740.88  $\text{cm}^{-1}$ (m, C-Cl).

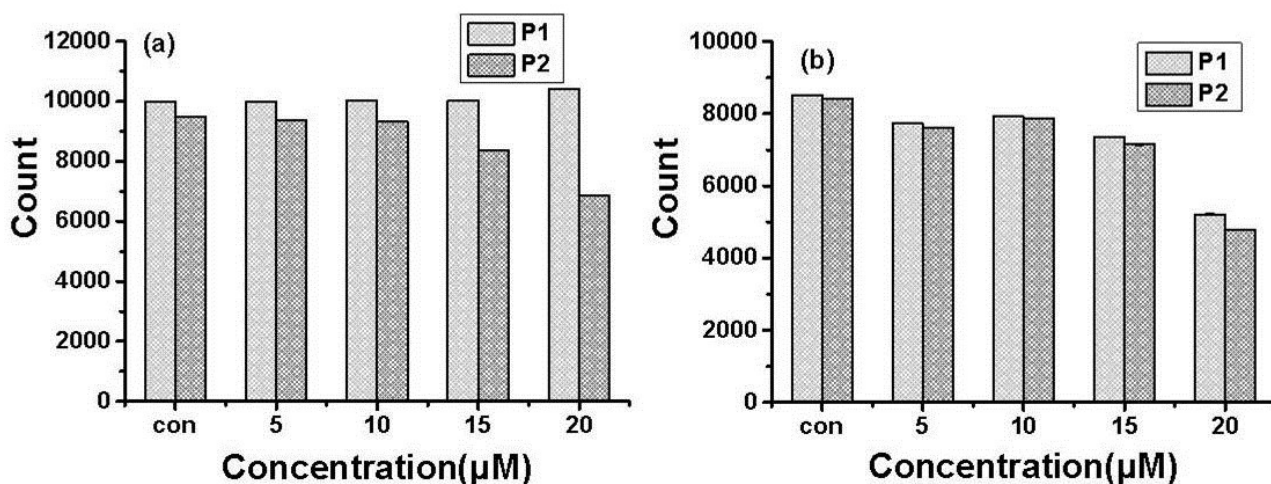

**Figure S6.** The number of cells counted in ROS detection. (a) The number of cells counted in the 23h N(TNCu-2) ROS experiment.;(b) The number of cells counted in the 30h N(TNCu-2) ROS experiment.



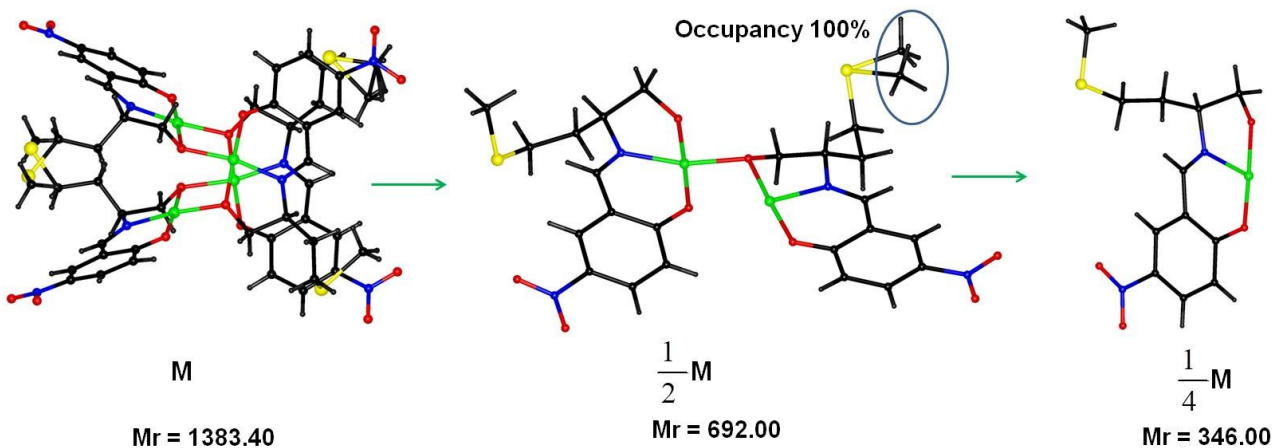

**Figure S7.** Liquid Chromatography Mass Spectrometry of positive ion of TNCu-1.

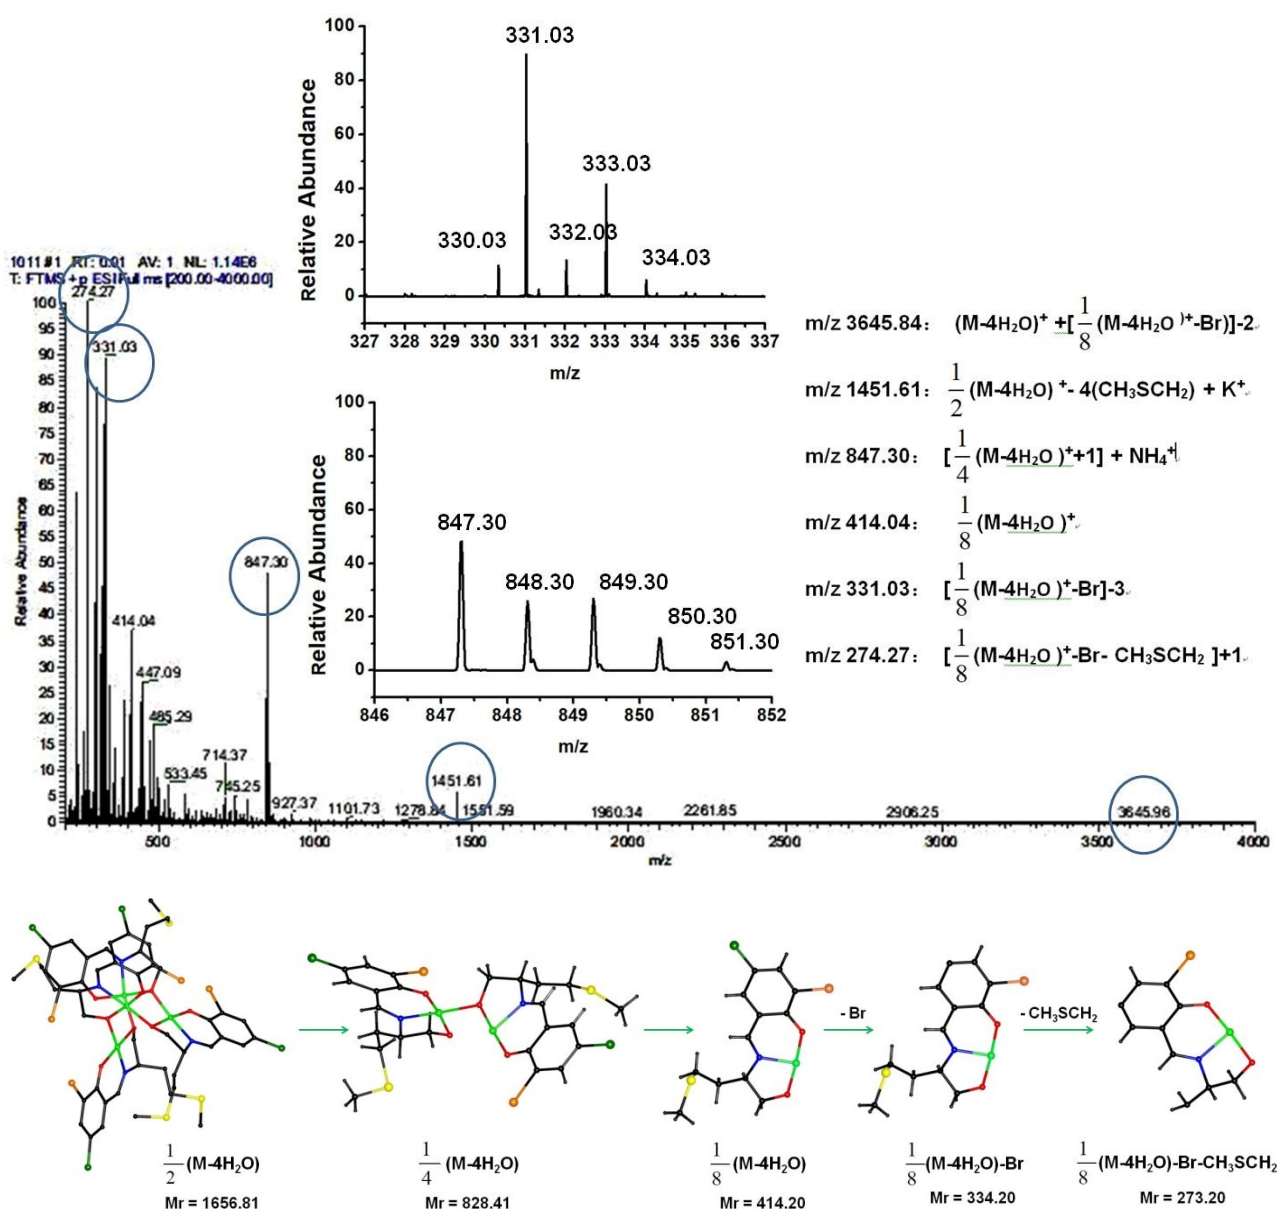

**Figure S8.** Liquid Chromatography Mass Spectrometry of positive ion of TNCu-2.
